# Supplementary material for: Trans-Cinnamic Acid Stimulates White Fat Browning and Activates Brown Adipocytes
Source: PubMed Central journal article supplement (PMC6470544; doi:10.3390/nu11030577), 2019-03-08
Supplement: nutrients-11-00577-s001.pdf [file nutrients-11-00577-s001.pdf]

Supplementary Materials

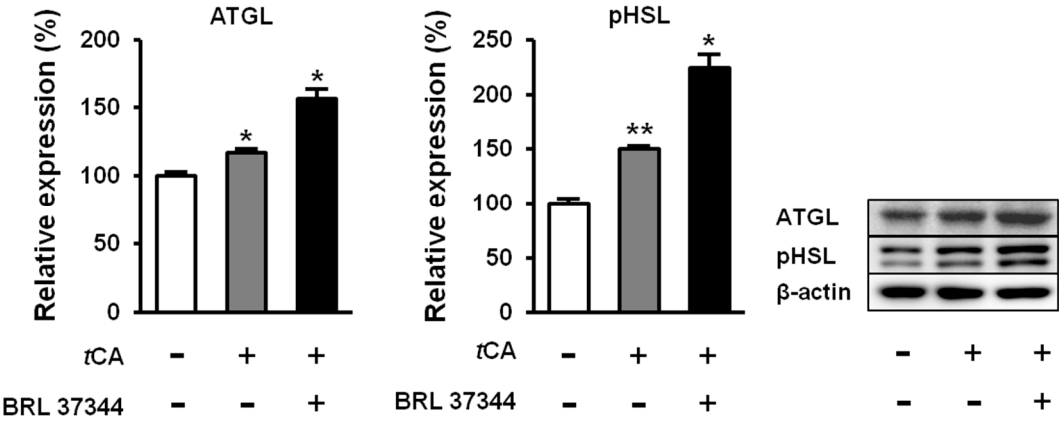

Figure 1. Figure S1: *tCA* upregulates lipolysis.
